# Supplementary material
Source: PubMed Central journal article supplement (PMC3277643)
Supplement: NIHMS345918-supplement-1_si_001.pdf [file NIHMS345918-supplement-1_si_001.pdf]

Supporting Information:

Ion Current vs. Ion/ $\ln q$  for Angiotensin and Fluoranthene

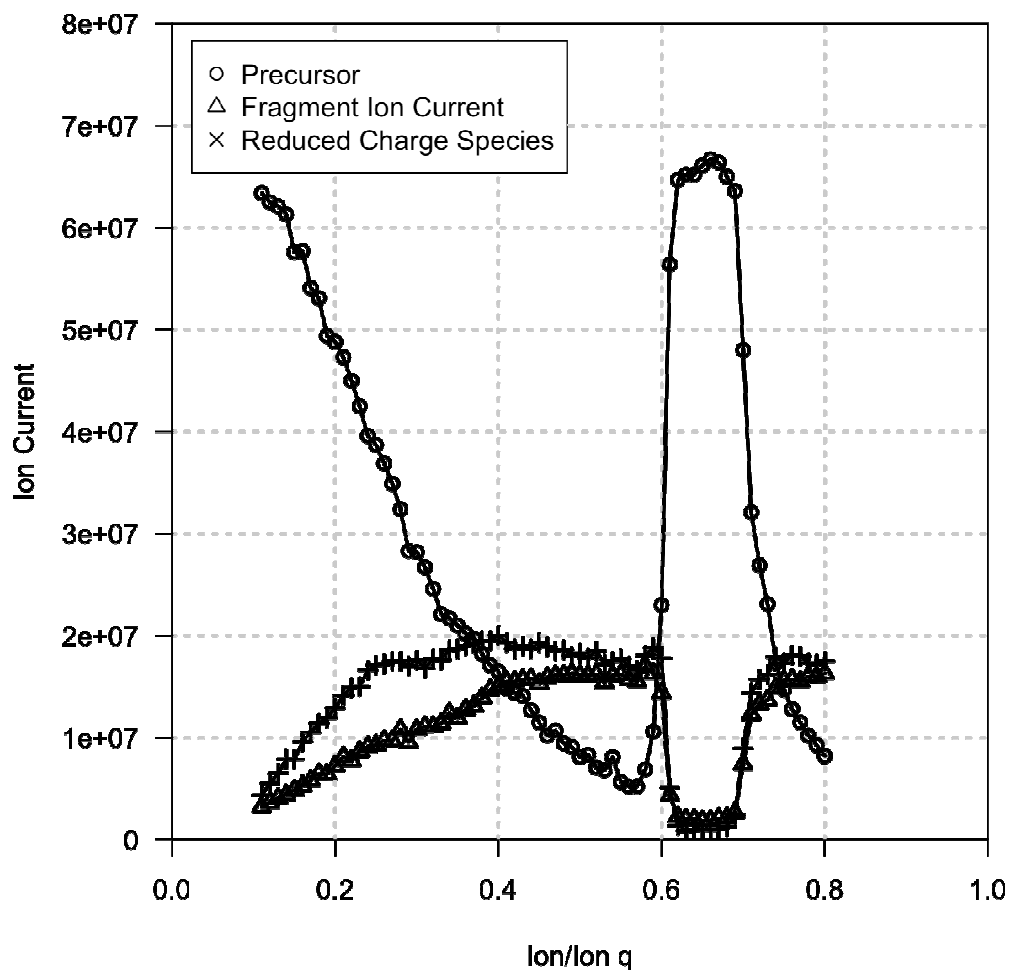

**Supporting Figure 1:** Precursor, fragment and reduced charge species ion currents demonstrating the presences and location of a parametric resonance induced by the interaction of the lens and main RF voltages applied during and ETD reaction. In the region between  $q = 0.6$  and  $q= 0.8$ , the reagent ion is no longer trapped, resulting in no ETD reaction.
